# Supplementary material
Source: PubMed Central journal article supplement (PMC3208358)
Supplement: supp_en.2010-0029_en-10-0029_Table_1_R1.pdf [file supp_en.2010-0029_en-10-0029_Table_1_R1.pdf]

**Supplemental Table 1. Real time PCR primers.**

| <b>Gene<sup>1</sup></b> | <b>Primer</b> | <b>Sequence<sup>2</sup></b> |
|-------------------------|---------------|-----------------------------|
| EMR1                    | F             | GCATAATCGCTGCTGGTTGA        |
|                         | R             | CCAGGCAAGGAGGACAGAGTT       |
| MCP1                    | F             | GCTGGAGAGCTACAAGAGGATCA     |
|                         | R             | CCTCTCTCTTGAGCTTGGTGACA     |
| TNF $\alpha$            | F             | AGACCCTCACACTCAGATCATCTTC   |
|                         | R             | CCTCCACTTGGTGGTTTGCT        |
| IL6                     | F             | GTCGGAGGCTTAATTACACATGTTC   |
|                         | R             | GAATTGCCATTGCACAACCTCTTT    |
| IGF-I                   | F             | CAGTTCGTGTGTGGACCGAG        |
|                         | R             | GCTCCGGAAGCAACACTCAT        |
| IGFBP5                  | F             | ATACAACCCAGAACGCCAGCT       |
|                         | R             | ACCTGGGCTATGCACTTGATG       |
| IGFIR                   | F             | GGCACAACTACTGCTCCAAAGAC     |
|                         | R             | CTTTATCACCACCACACTTCTG      |
| PR                      | F             | CAGAAGCCAGCCAGAGCC          |
|                         | R             | CACAGGTAAGCACGCCATAGT       |
| ER $\alpha$             | F             | TGCACCATTGACAAGAACCGGA      |
|                         | R             | AGCACCCATTTCAATTCGGCCT      |
| Amphiregulin            | R             | AACTCCGCTGCTACCGCTGG        |
|                         | R             | TCCACCGGCACTGTGGTCCC        |
| 18S                     | F             | GTGGGCCTGCGGCTTAAT          |
|                         | R             | GCGAGAGTCTCGTTCGTTATC       |

<sup>1</sup> Primers were designed to measure the abundance of egf-like module containing mucin-like hormone receptor-like sequence 1 (EMR1), monocyte chemoattractant protein 1 (MCP-1), TNF $\alpha$ , IL6, IGF-I, IGF binding protein 5 (IGFBP5), IGF-I receptor (IGFIR), progesterone receptor (PR), estrogen receptor (ER $\alpha$ ), amphiregulin, and 18S ribosomal RNA (18S) transcripts.

<sup>2</sup> Primer sequences are shown in the 5' to 3' orientation.
